# Supplementary material for: Mineral Dust and Pedogenesis in the Alpine Critical Zone
Source: Copernicus journal article supplement (doi:10.5194/egusphere-2023-1840), 2023-09-13
Supplement: Supplementary file 1 [file Table S1. Dust Geochem.xlsx]

## Sheet: Table S1. Dust Geochem
Table S1. Summary Geochemistry Data for Dust Samples
Element	Units	11 dust	12 dust	13 dust	14 dust	15 dust	16 dust
Be	mg/kg	3.1 ± 1.0	2.5 ± 0.2	2.8 ± 0.4	1.8 ± 0.5	1.8 ± 0.0	1.9 ± 0.2
Na	%	1.3 ± 0.1	1.3 ± 0.0	1.2 ± 0.1	1.0 ± 0.2	1.2 ± 0.0	1.1 ± 0.1
Mg	%	1.2 ± 0.2	1.4 ± 0.2	1.1 ± 0.2	0.9 ± 0.1	1.0 ± 0.3	0.8 ± 0.1
Al	%	8.3 ± 1.3	7.3 ± 0.4	7.1 ± 0.1	6.5 ± 0.6	6.9 ± 0.8	6.7 ± 0.3
K	%	2.7 ± 0.2	2.5 ± 0.2	2.6 ± 0.3	2.3 ± 0.2	2.0 ± 0.2	2.2 ± 0.2
Ca	%	1.7 ± 0.4	1.4 ± 0.2	1.2 ± 0.1	1.3 ± 0.7	1.6 ± 0.6	1.2 ± 0.4
Sc	mg/kg	10.3 ± 1.0	9.1 ± 0.8	9.2 ± 0.6	9.6 ± 1.6	9.1 ± 1.3	8.8 ± 0.2
P	%	0.3 ± 0.2	0.3 ± 0.1	0.3 ± 0.1	0.3 ± 0.2	0.3 ± 0.1	0.3 ± 0.3
Cr	mg/kg	56.6 ± 2.5	63.2 ± 3.0	62.7 ± 5.4	58.4 ± 2.3	54.6 ± 10.2	58.7 ± 6.2
Mn	mg/kg	714.9 ± 353.4	755.4 ± 249.3	603.8 ± 169.0	676.8 ± 592.7	659.4 ± 370.1	488.5 ± 247.9
Cu	mg/kg	68.3 ± 32.3	141.4 ± 52.7	94.9 ± 22.1	89.1 ± 33.0	91.4 ± 15.5	74.3 ± 24.5
Zn	mg/kg	367.7 ± 38.1	498.3 ± 113.4	462.1 ± 165.4	364.1 ± 206.2	521.1 ± 407.1	292.0 ± 50.5
V	mg/kg	83.3 ± 5.2	70.3 ± 5.1	65.7 ± 6.5	58.4 ± 10.6	79.3 ± 8.3	64.4 ± 1.5
Fe	%	3.5 ± 0.2	3.5 ± 0.4	3.5 ± 0.5	2.9 ± 0.6	3.2 ± 0.1	3.1 ± 0.4
Co	mg/kg	11.1 ± 1.7	11.8 ± 1.5	10.7 ± 1.6	8.9 ± 2.1	9.9 ± 0.7	8.8 ± 0.8
Ni	mg/kg	29.4 ± 4.7	36.4 ± 6.4	34.4 ± 7.4	25.9 ± 5.1	28.9 ± 1.6	26.4 ± 3.8
Ti	%	0.4 ± 0.0	0.4 ± 0.0	0.5 ± 0.0	0.4 ± 0.1	0.4 ± 0.0	0.4 ± 0.1
Ga	mg/kg	24.3 ± 3.0	23.1 ± 1.6	24.2 ± 1.0	19.4 ± 1.2	20.5 ± 3.4	22.1 ± 0.8
Rb	mg/kg	112.8 ± 72.3	82.6 ± 27.9	95.1 ± 37.0	81.7 ± 7.3	65.4 ± 29.8	74.0 ± 26.7
Sr	mg/kg	306.6 ± 50.9	252.9 ± 22.3	226.8 ± 21.2	168.3 ± 31.3	247.0 ± 28.5	194.8 ± 16.7
Y	mg/kg	22.3 ± 4.0	21.5 ± 1.6	24.3 ± 1.4	24.4 ± 3.0	18.5 ± 3.3	22.4 ± 1.7
Zr	mg/kg	167.9 ± 5.0	168.3 ± 22.8	210.0 ± 16.8	240.4 ± 78.6	175.0 ± 21.6	216.2 ± 35.2
As	mg/kg	20.9 ± 6.1	15.7 ± 4.1	10.8 ± 2.7	7.3 ± 1.2	27.2 ± 11.0	8.5 ± 1.9
Nb	mg/kg	15.9 ± 2.0	16.9 ± 2.1	28.7 ± 5.6	14.1 ± 2.2	12.2 ± 0.2	16.7 ± 3.4
Mo	mg/kg	1.7 ± 0.5	2.4 ± 1.2	2.6 ± 0.7	1.7 ± 0.8	1.6 ± 0.2	1.2 ± 0.2
Cd	mg/kg	1.0 ± 0.4	1.3 ± 0.7	1.0 ± 0.5	0.7 ± 0.4	0.8 ± 0.3	0.7 ± 0.5
Sn	mg/kg	37.2 ± 37.7	45.9 ± 15.7	35.7 ± 15.2	34.5 ± 18.5	32.1 ± 8.5	40.0 ± 23.7
Sb	mg/kg	53.9 ± 34.3	40.1 ± 17.8	63.3 ± 45.1	34.1 ± 20.2	32.6 ± 21.2	48.0 ± 12.6
Ba	mg/kg	1310.2 ± 129.8	964.6 ± 101.1	776.5 ± 76.7	756.6 ± 178.0	1356.3 ± 369.6	943.9 ± 58.0
La	mg/kg	37.7 ± 16.3	39.8 ± 6.7	43.9 ± 7.7	38.2 ± 4.9	25.8 ± 8.4	32.7 ± 4.6
Ce	mg/kg	90.2 ± 25.3	101.4 ± 9.7	111.4 ± 7.5	89.9 ± 13.3	65.5 ± 11.3	80.9 ± 12.1
Pr	mg/kg	8.5 ± 2.6	8.7 ± 1.0	9.7 ± 1.1	9.0 ± 1.2	6.3 ± 1.7	7.8 ± 0.7
Nd	mg/kg	32.4 ± 9.1	32.5 ± 3.1	35.9 ± 3.8	35.0 ± 5.3	24.6 ± 6.0	29.9 ± 2.2
Sm	mg/kg	6.2 ± 1.4	6.0 ± 0.4	6.7 ± 0.5	6.7 ± 1.1	4.9 ± 0.9	5.8 ± 0.4
Eu	mg/kg	1.4 ± 0.2	1.3 ± 0.1	1.3 ± 0.1	1.5 ± 0.3	1.1 ± 0.2	1.2 ± 0.1
Gd	mg/kg	5.4 ± 1.0	5.3 ± 0.3	5.9 ± 0.2	5.9 ± 1.0	4.3 ± 0.7	5.2 ± 0.5
Tb	mg/kg	0.8 ± 0.1	0.7 ± 0.0	0.8 ± 0.0	0.8 ± 0.1	0.6 ± 0.1	0.8 ± 0.1
Dy	mg/kg	4.6 ± 0.8	4.4 ± 0.3	5.0 ± 0.2	5.0 ± 0.7	3.9 ± 0.6	4.6 ± 0.3
Ho	mg/kg	0.9 ± 0.2	0.9 ± 0.1	1.0 ± 0.0	1.0 ± 0.1	0.8 ± 0.1	0.9 ± 0.1
Er	mg/kg	2.7 ± 0.4	2.7 ± 0.2	3.0 ± 0.1	2.9 ± 0.4	2.4 ± 0.3	2.7 ± 0.2
Yb	mg/kg	2.6 ± 0.3	2.5 ± 0.1	2.9 ± 0.1	2.8 ± 0.4	2.2 ± 0.3	2.6 ± 0.2
Lu	mg/kg	0.4 ± 0.1	0.4 ± 0.0	0.4 ± 0.0	0.4 ± 0.1	0.3 ± 0.1	0.4 ± 0.0
Hf	mg/kg	4.5 ± 0.2	4.5 ± 0.5	5.8 ± 0.5	6.2 ± 1.9	4.6 ± 0.6	5.7 ± 0.9
Ta	mg/kg	1.2 ± 0.2	1.2 ± 0.1	2.0 ± 0.4	0.9 ± 0.1	0.8 ± 0.0	1.1 ± 0.2
Tl	mg/kg	1.1 ± 0.1	1.0 ± 0.1	0.9 ± 0.1	0.6 ± 0.0	0.9 ± 0.2	0.8 ± 0.0
Pb	mg/kg	61.2 ± 16.3	62.1 ± 6.0	67.5 ± 11.5	52.1 ± 15.0	47.8 ± 16.2	47.6 ± 14.0
Bi	mg/kg	0.9 ± 0.1	0.8 ± 0.1	0.7 ± 0.2	0.5 ± 0.2	0.5 ± 0.1	0.5 ± 0.0
W	mg/kg	4.6 ± 0.1	4.4 ± 0.7	2.7 ± 0.3	2.6 ± 0.6	4.1 ± 1.0	2.6 ± 0.2
Th	mg/kg	17.0 ± 5.0	14.4 ± 1.6	19.6 ± 2.7	12.0 ± 1.3	10.5 ± 2.6	13.9 ± 1.6
U	mg/kg	5.2 ± 1.4	4.1 ± 0.5	5.9 ± 0.9	3.7 ± 0.4	3.6 ± 0.7	3.4 ± 0.5
Lan/Lun	--	10.3 ± 2.9	11.3 ± 1.5	10.7 ± 1.6	9.6 ± 1.2	8.2 ± 1.7	8.8 ± 0.8
Eu*	--	0.74 ± 0.04	0.7 ± 0.01	0.63 ± 0.03	0.75 ± 0.03	0.76 ± 0.03	0.68 ± 0.02
