# Supplementary material for: Mineral Dust and Pedogenesis in the Alpine Critical Zone
Source: Copernicus journal article supplement (doi:10.5194/egusphere-2023-1840), 2023-09-13
Supplement: Supplementary file 2 [file Table S2. Soil Geochem.xlsx]

## Sheet: Table S2. Soil Geochem
Table S2. Summary Geochemistry Data for Soil Samples
Element	Units	11 soil	12 soil	13 soil	14 soil	15 soil	16 soil
Be	mg/kg	5.2 ± 1.0	2.6 ± 0.2	4.2 ± 0.9	3.0 ± 0.2	2.8 ± 0.5	2.5 ± 0.2
Na	%	1.2 ± 0.1	1.2 ± 0.1	0.8 ± 0.1	1.3 ± 0.1	1.2 ± 0.2	0.9 ± 0.1
Mg	%	0.9 ± 0.1	1.0 ± 0.1	0.6 ± 0.1	1.1 ± 0.1	0.9 ± 0.2	0.8 ± 0.0
Al	%	9.8 ± 0.7	8.7 ± 0.4	9.2 ± 0.7	9.1 ± 0.3	9.8 ± 1.3	9.2 ± 0.9
K	%	3.0 ± 0.1	2.7 ± 0.0	3.4 ± 0.8	2.4 ± 0.1	2.4 ± 0.2	2.7 ± 0.2
Ca	%	1.2 ± 0.0	1.0 ± 0.1	0.7 ± 0.1	1.1 ± 0.3	1.3 ± 0.5	1.0 ± 0.4
Sc	mg/kg	9.6 ± 0.8	8.6 ± 0.9	6.5 ± 0.5	14.7 ± 2.5	10.7 ± 1.6	9.1 ± 0.6
P	%	0.1 ± 0.0	0.1 ± 0.0	0.1 ± 0.0	0.2 ± 0.1	0.2 ± 0.0	0.1 ± 0.0
Cr	mg/kg	49.0 ± 2.9	44.3 ± 3.2	26.7 ± 2.3	46.4 ± 1.8	47.6 ± 6.9	53.3 ± 10.2
Mn	mg/kg	955.1 ± 402.7	546.7 ± 134.3	560.9 ± 176.4	809.7 ± 201.7	1069.8 ± 428.0	953.0 ± 212.8
Cu	mg/kg	34.4 ± 2.7	20.7 ± 5.1	16.2 ± 1.2	46.5 ± 3.0	55.1 ± 17.0	26.9 ± 3.4
Zn	mg/kg	104.9 ± 16.3	77.1 ± 13.1	64.6 ± 6.6	72.9 ± 7.6	166.3 ± 51.1	91.8 ± 9.3
V	mg/kg	83.3 ± 6.7	63.8 ± 2.4	42.2 ± 3.7	97.0 ± 11.7	98.4 ± 18.3	69.8 ± 6.7
Fe	%	3.8 ± 0.3	3.2 ± 0.3	2.7 ± 0.2	4.4 ± 0.5	4.3 ± 0.8	3.4 ± 0.3
Co	mg/kg	10.3 ± 2.4	8.4 ± 0.9	5.3 ± 0.7	11.1 ± 1.3	12.8 ± 2.4	11.2 ± 0.9
Ni	mg/kg	22.4 ± 2.3	19.7 ± 2.2	10.8 ± 1.0	18.5 ± 1.4	28.8 ± 8.7	21.6 ± 3.4
Ti	%	0.5 ± 0.0	0.5 ± 0.0	0.5 ± 0.0	0.5 ± 0.0	0.5 ± 0.1	0.5 ± 0.1
Ga	mg/kg	25.9 ± 1.4	22.4 ± 1.1	28.3 ± 2.1	26.3 ± 1.6	24.8 ± 2.5	23.7 ± 2.1
Rb	mg/kg	156.7 ± 19.2	120.7 ± 10.0	232.3 ± 53.5	91.4 ± 13.8	133.0 ± 27.5	128.0 ± 5.6
Sr	mg/kg	269.3 ± 18.0	225.5 ± 7.8	164.7 ± 19.8	183.0 ± 15.5	299.2 ± 56.4	187.7 ± 48.8
Y	mg/kg	22.5 ± 1.5	20.1 ± 1.6	28.7 ± 2.7	27.3 ± 5.4	22.7 ± 5.3	22.3 ± 1.4
Zr	mg/kg	159.0 ± 14.8	155.2 ± 12.4	228.0 ± 26.3	160.2 ± 15.4	195.4 ± 36.0	196.3 ± 27.4
As	mg/kg	16.2 ± 1.4	6.9 ± 0.4	7.7 ± 0.8	10.7 ± 1.0	134.9 ± 124.5	10.1 ± 0.8
Nb	mg/kg	19.4 ± 0.5	18.8 ± 0.7	87.4 ± 24.3	15.9 ± 0.8	17.9 ± 2.9	20.1 ± 2.3
Mo	mg/kg	1.7 ± 0.2	1.0 ± 0.2	2.7 ± 0.5	1.8 ± 0.2	2.0 ± 0.4	1.4 ± 0.2
Cd	mg/kg	0.6 ± 0.3	0.3 ± 0.1	0.2 ± 0.0	0.3 ± 0.1	1.3 ± 1.0	0.8 ± 0.3
Sn	mg/kg	3.8 ± 0.3	2.7 ± 0.2	4.8 ± 0.6	3.1 ± 0.2	2.9 ± 0.2	3.1 ± 0.3
Sb	mg/kg	2.4 ± 0.0	1.3 ± 0.1	1.1 ± 0.1	1.2 ± 0.1	27.5 ± 31.4	1.2 ± 0.0
Ba	mg/kg	1185.3 ± 87.6	887.5 ± 69.2	565.9 ± 45.8	880.6 ± 92.2	1366.4 ± 185.6	918.8 ± 61.2
La	mg/kg	34.6 ± 3.9	33.3 ± 3.5	50.9 ± 7.0	53.5 ± 11.5	33.2 ± 8.5	36.4 ± 3.3
Ce	mg/kg	67.7 ± 9.1	75.3 ± 4.1	112.9 ± 20.9	151.3 ± 37.5	79.3 ± 23.1	87.5 ± 10.2
Pr	mg/kg	8.0 ± 0.7	7.7 ± 0.7	11.8 ± 2.1	12.0 ± 2.6	7.8 ± 1.7	8.0 ± 0.5
Nd	mg/kg	30.8 ± 2.5	28.9 ± 2.7	41.1 ± 6.7	47.5 ± 10.7	30.2 ± 6.5	29.9 ± 1.7
Sm	mg/kg	6.0 ± 0.5	5.5 ± 0.5	7.9 ± 1.2	9.2 ± 2.2	6.0 ± 1.4	5.7 ± 0.3
Eu	mg/kg	1.4 ± 0.1	1.2 ± 0.1	1.0 ± 0.1	2.3 ± 0.5	1.4 ± 0.3	1.2 ± 0.0
Gd	mg/kg	5.2 ± 0.4	4.7 ± 0.4	6.5 ± 0.8	7.7 ± 1.8	5.4 ± 1.4	4.9 ± 0.2
Tb	mg/kg	0.8 ± 0.1	0.7 ± 0.1	1.0 ± 0.1	1.1 ± 0.2	0.8 ± 0.2	0.7 ± 0.0
Dy	mg/kg	4.9 ± 0.3	4.3 ± 0.4	6.0 ± 0.6	6.2 ± 1.2	4.9 ± 1.2	4.7 ± 0.2
Ho	mg/kg	1.0 ± 0.1	0.9 ± 0.1	1.2 ± 0.1	1.2 ± 0.2	1.0 ± 0.2	0.9 ± 0.0
Er	mg/kg	2.7 ± 0.2	2.5 ± 0.2	3.6 ± 0.4	3.3 ± 0.6	2.7 ± 0.6	2.6 ± 0.1
Yb	mg/kg	2.7 ± 0.1	2.5 ± 0.2	3.9 ± 0.4	3.1 ± 0.4	2.6 ± 0.5	2.6 ± 0.1
Lu	mg/kg	0.4 ± 0.0	0.4 ± 0.0	0.6 ± 0.1	0.4 ± 0.1	0.4 ± 0.1	0.4 ± 0.0
Hf	mg/kg	4.5 ± 0.4	4.4 ± 0.3	7.6 ± 1.0	4.7 ± 0.3	5.3 ± 0.8	5.3 ± 0.7
Ta	mg/kg	2.1 ± 0.5	1.3 ± 0.1	6.2 ± 1.9	1.0 ± 0.1	1.2 ± 0.2	1.3 ± 0.1
Tl	mg/kg	1.1 ± 0.0	0.8 ± 0.1	1.3 ± 0.1	0.7 ± 0.1	1.5 ± 0.7	0.8 ± 0.1
Pb	mg/kg	35.0 ± 5.3	26.8 ± 1.3	84.2 ± 24.4	33.3 ± 3.9	30.8 ± 3.4	33.2 ± 4.7
Bi	mg/kg	1.6 ± 1.0	0.3 ± 0.0	0.6 ± 0.1	0.7 ± 0.1	0.4 ± 0.0	0.4 ± 0.0
W	mg/kg	7.4 ± 2.5	4.4 ± 0.5	3.3 ± 1.0	7.3 ± 3.9	11.9 ± 7.9	3.8 ± 0.7
Th	mg/kg	15.9 ± 1.4	15.5 ± 1.1	43.4 ± 7.3	15.2 ± 1.1	14.5 ± 2.6	16.4 ± 2.4
U	mg/kg	5.7 ± 0.4	4.0 ± 0.1	12.0 ± 2.9	4.4 ± 0.4	5.4 ± 1.4	4.0 ± 0.1
Lan/Lun	--	9.2 ± 0.8	9.6 ± 0.8	9.4 ± 1.3	12.3 ± 1.2	9.1 ± 1.9	10 ± 1.2
Eu*	--	0.75 ± 0.01	0.73 ± 0.02	0.42 ± 0.04	0.82 ± 0.02	0.76 ± 0.02	0.69 ± 0.01
