# Supplementary material for: Mineral Dust and Pedogenesis in the Alpine Critical Zone
Source: Copernicus journal article supplement (doi:10.5194/egusphere-2023-1840), 2023-09-13
Supplement: Supplementary file 3 [file Table S3. Rock Geochem.xlsx]

## Sheet: Table S3. Rock Geochem
Table S3. Summary Geochemistry Data for Rock Samples
Element	Units	11 rock	12 rock	13 rock	14 rock	15 rock	16 rock
Be	mg/kg	6.2 ± 8.9	0.9 ± 0.4	5.3 ± 0.6	2.0 ± 0.1	0.5 ± 0.5	0.3 ± 0.1
Na	%	0.1 ± 0.0	0.0 ± 0.0	0.3 ± 0.6	4.2 ± 0.1	0.0 ± 0.0	0.0 ± 0.0
Mg	%	0.1 ± 0.0	0.2 ± 0.1	0.1 ± 0.0	0.4 ± 0.2	0.0 ± 0.0	0.1 ± 0.0
Al	%	2.1 ± 0.7	2.5 ± 0.9	6.7 ± 0.4	9.1 ± 0.3	0.7 ± 0.3	1.8 ± 0.5
K	%	1.1 ± 0.5	1.4 ± 0.6	3.3 ± 0.3	2.6 ± 0.1	0.2 ± 0.1	0.8 ± 0.3
Ca	%	0.0 ± 0.0	0.0 ± 0.0	0.1 ± 0.0	0.6 ± 0.1	0.1 ± 0.0	0.0 ± 0.0
Sc	mg/kg	1.4 ± 0.8	3.1 ± 1.5	2.4 ± 0.1	5.7 ± 0.5	0.7 ± 0.3	1.1 ± 0.4
P	%	0.0 ± 0.0	0.0 ± 0.0	0.0 ± 0.0	0.1 ± 0.0	0.1 ± 0.1	0.0 ± 0.0
Cr	mg/kg	11.3 ± 6.8	14.6 ± 6.1	1.6 ± 0.4	9.4 ± 1.2	6.1 ± 2.1	7.2 ± 2.6
Mn	mg/kg	304.7 ± 196.2	50.7 ± 21.9	343.7 ± 186.7	436.4 ± 121.3	51.9 ± 43.6	26.6 ± 13.6
Cu	mg/kg	2.5 ± 1.1	2.0 ± 0.4	2.2 ± 0.4	14.6 ± 3.0	25.6 ± 26.1	1.3 ± 0.5
Zn	mg/kg	6.7 ± 3.3	8.2 ± 2.1	20.9 ± 15.0	19.0 ± 6.4	16.7 ± 11.7	3.6 ± 1.3
V	mg/kg	10.2 ± 4.3	34.6 ± 15.9	3.6 ± 1.0	94.2 ± 8.9	17.6 ± 7.0	6.6 ± 1.6
Fe	%	0.5 ± 0.2	1.6 ± 0.6	0.8 ± 0.2	3.7 ± 0.4	0.8 ± 0.7	0.5 ± 0.2
Co	mg/kg	15.7 ± 11.8	34.9 ± 17.8	8.7 ± 4.3	18.2 ± 3.7	44.5 ± 15.8	53.1 ± 47.5
Ni	mg/kg	2.8 ± 0.5	6.0 ± 2.5	0.4 ± 0.1	5.1 ± 0.7	5.2 ± 4.0	3.3 ± 0.9
Ti	%	0.1 ± 0.1	0.5 ± 0.3	0.1 ± 0.0	0.4 ± 0.0	0.0 ± 0.0	0.1 ± 0.0
Ga	mg/kg	5.6 ± 2.1	7.1 ± 2.4	23.7 ± 2.1	22.2 ± 0.4	1.8 ± 0.6	4.2 ± 1.1
Rb	mg/kg	60.2 ± 31.4	47.8 ± 18.4	271.7 ± 19.2	56.4 ± 7.3	5.3 ± 2.5	23.5 ± 5.6
Sr	mg/kg	16.8 ± 9.1	15.2 ± 4.8	12.1 ± 2.5	315.7 ± 37.4	42.8 ± 50.4	7.1 ± 2.1
Y	mg/kg	3.9 ± 1.8	12.6 ± 3.8	34.7 ± 13.1	9.6 ± 1.5	5.4 ± 3.4	3.3 ± 0.9
Zr	mg/kg	19.6 ± 12.4	121.0 ± 65.3	287.2 ± 9.5	86.7 ± 21.0	28.0 ± 4.6	36.3 ± 17.3
As	mg/kg	1.1 ± 0.6	2.8 ± 3.2	3.5 ± 1.1	1.8 ± 0.7	82.9 ± 81.2	1.0 ± 0.7
Nb	mg/kg	4.8 ± 3.1	9.3 ± 4.0	76.2 ± 3.2	11.6 ± 0.7	1.7 ± 0.5	2.9 ± 0.9
Mo	mg/kg	0.4 ± 0.2	0.4 ± 0.2	2.3 ± 1.1	0.9 ± 1.2	0.7 ± 0.4	0.5 ± 0.6
Cd	mg/kg	0.1 ± 0.0	0.1 ± 0.0	0.1 ± 0.0	0.1 ± 0.0	0.1 ± 0.1	0.0 ± 0.0
Sn	mg/kg	0.9 ± 0.4	0.8 ± 0.3	4.3 ± 0.6	1.4 ± 0.1	0.2 ± 0.1	0.3 ± 0.1
Sb	mg/kg	0.1 ± 0.1	0.3 ± 0.1	0.4 ± 0.1	0.5 ± 0.4	36.5 ± 22.3	0.2 ± 0.2
Ba	mg/kg	206.9 ± 88.6	184.1 ± 48.4	63.7 ± 9.7	1003.8 ± 85.4	208.3 ± 172.0	151.5 ± 62.5
La	mg/kg	9.5 ± 3.6	13.4 ± 4.0	52.1 ± 4.6	20.0 ± 2.9	4.9 ± 1.0	8.6 ± 3.4
Ce	mg/kg	22.8 ± 8.9	33.1 ± 11.1	115.5 ± 11.6	65.4 ± 4.5	9.8 ± 2.4	18.3 ± 7.3
Pr	mg/kg	2.2 ± 0.9	3.7 ± 1.1	11.2 ± 1.3	5.5 ± 1.0	1.2 ± 0.3	1.9 ± 0.7
Nd	mg/kg	8.4 ± 3.3	14.8 ± 4.2	36.5 ± 3.8	22.2 ± 4.2	5.0 ± 1.4	6.9 ± 2.5
Sm	mg/kg	1.5 ± 0.6	3.0 ± 0.9	7.2 ± 0.6	4.3 ± 0.9	1.1 ± 0.5	1.1 ± 0.4
Eu	mg/kg	0.3 ± 0.1	0.7 ± 0.2	0.3 ± 0.0	1.2 ± 0.2	0.3 ± 0.2	0.3 ± 0.1
Gd	mg/kg	1.2 ± 0.5	2.6 ± 0.7	5.9 ± 0.7	3.4 ± 0.7	1.3 ± 0.9	0.9 ± 0.3
Tb	mg/kg	0.2 ± 0.1	0.4 ± 0.1	1.0 ± 0.2	0.4 ± 0.1	0.2 ± 0.1	0.1 ± 0.0
Dy	mg/kg	0.9 ± 0.4	2.7 ± 0.8	6.7 ± 2.1	2.5 ± 0.4	1.1 ± 0.7	0.7 ± 0.2
Ho	mg/kg	0.2 ± 0.1	0.6 ± 0.2	1.4 ± 0.5	0.5 ± 0.1	0.2 ± 0.1	0.1 ± 0.0
Er	mg/kg	0.5 ± 0.2	1.6 ± 0.5	4.4 ± 1.5	1.3 ± 0.2	0.5 ± 0.3	0.4 ± 0.1
Yb	mg/kg	0.5 ± 0.2	1.7 ± 0.6	5.2 ± 1.4	1.2 ± 0.1	0.5 ± 0.2	0.4 ± 0.1
Lu	mg/kg	0.1 ± 0.0	0.3 ± 0.1	0.8 ± 0.2	0.2 ± 0.0	0.1 ± 0.0	0.1 ± 0.0
Hf	mg/kg	0.7 ± 0.4	3.3 ± 1.7	10.7 ± 0.3	3.0 ± 0.4	0.8 ± 0.1	1.0 ± 0.4
Ta	mg/kg	2.2 ± 1.8	1.1 ± 0.2	5.2 ± 0.2	0.7 ± 0.1	0.5 ± 0.1	0.9 ± 0.6
Tl	mg/kg	0.4 ± 0.2	0.2 ± 0.1	1.3 ± 0.1	0.4 ± 0.1	0.4 ± 0.1	0.1 ± 0.0
Pb	mg/kg	5.6 ± 2.7	4.9 ± 1.2	37.0 ± 11.6	4.5 ± 0.8	11.7 ± 11.9	2.6 ± 0.9
Bi	mg/kg	1.2 ± 2.0	0.0 ± 0.0	0.4 ± 0.1	0.6 ± 0.8	0.0 ± 0.0	0.8 ± 1.9
W	mg/kg	182.9 ± 207.3	470.0 ± 235.5	64.1 ± 12.0	58.2 ± 19.3	426.7 ± 118.4	637.5 ± 534.3
Th	mg/kg	5.2 ± 2.3	5.3 ± 2.0	70.0 ± 5.6	6.8 ± 0.3	1.5 ± 0.5	4.4 ± 1.4
U	mg/kg	2.3 ± 1.7	1.6 ± 0.6	18.6 ± 1.5	2.3 ± 0.2	1.4 ± 0.6	0.5 ± 0.2
Lan/Lun	--	15.8 ± 5.1	5.7 ± 0.8	7.4 ± 1.7	11.9 ± 1.2	8.1 ± 1.2	16.8 ± 7.3
Eu*	--	0.66 ± 0.05	0.78 ± 0.03	0.14 ± 0.01	0.98 ± 0.02	0.71 ± 0.04	0.74 ± 0.06
